# Supplementary material for: Unlocking color-tunable emission of Eu2+-activated phosphors through doping-free exploration of hidden sites
Source: Royal Society of Chemistry journal article supplement (doi:10.1039/d4tc01277a), 2024-01-01
Supplement: d4tc01277a1.pdf [file d4tc01277a1.pdf]

## Supporting Information

### Unlocking Color-Tunable Emission of Eu<sup>2+</sup>-Activated Phosphors through Doping-Free Exploration of Hidden Sites

Dongkai Hu<sup>a</sup>, Mavlanjan Rahman<sup>a</sup>, Shuifu Liu<sup>b</sup>, Lina Shen<sup>a</sup>, Dawei Wen<sup>\*c</sup>, Pengpeng Dai<sup>\*a</sup>, and Mingmei Wu<sup>\*d</sup>

<sup>a</sup> *Xinjiang Key Laboratory for Luminescence Minerals and Optical Functional Materials, School of Physics and Electronic Engineering, Xinjiang Normal University, 102 Xinyi Road, Urumqi, Xinjiang 830054, China*

<sup>b</sup> *College of Materials, Xiamen University, Xiamen, Fujian 361005, China*

<sup>c</sup> *School of Applied Physics and Materials, Wuyi University, Jiangmen, Guangdong 529020, China*

<sup>d</sup> *School of Chemical Engineering and Technology, Sun Yat-Sen University, Zhuhai, Guangdong 519082, China*

### Supporting Figures:

---

\*Corresponding authors: [daipp614@nenu.edu.cn](mailto:daipp614@nenu.edu.cn) (P. Dai), [ontaii@163.com](mailto:ontaii@163.com) (D. Wen), [ceswmm@mail.sysu.edu.cn](mailto:ceswmm@mail.sysu.edu.cn) (M. Wu)

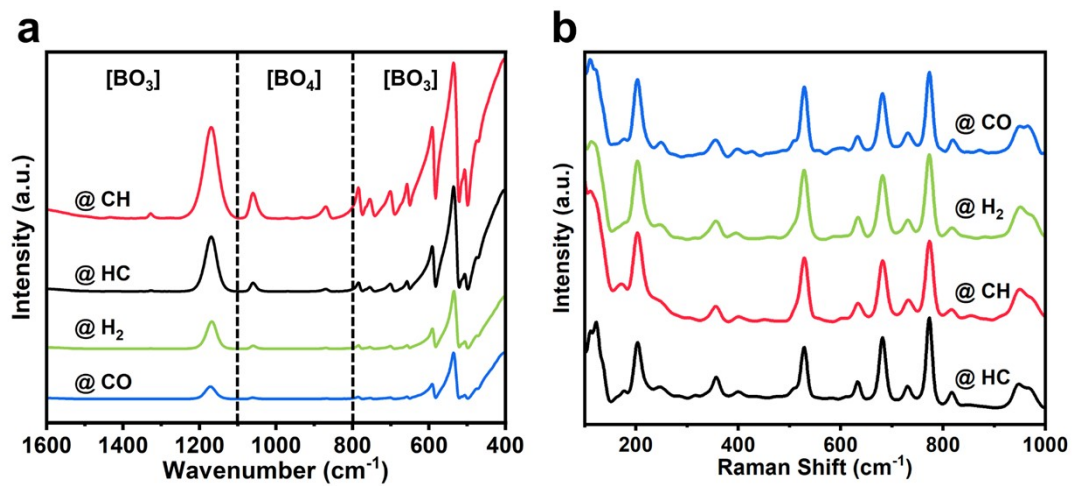

**Fig. S1** (a) Fourier transform infrared (FT-IR) spectra and (b) Raman spectra of NBB:Eu<sup>2+</sup>@CO, NBB:Eu<sup>2+</sup>@H<sub>2</sub>, NBB:Eu<sup>2+</sup>@CH and NBB:Eu<sup>2+</sup>@HC samples.

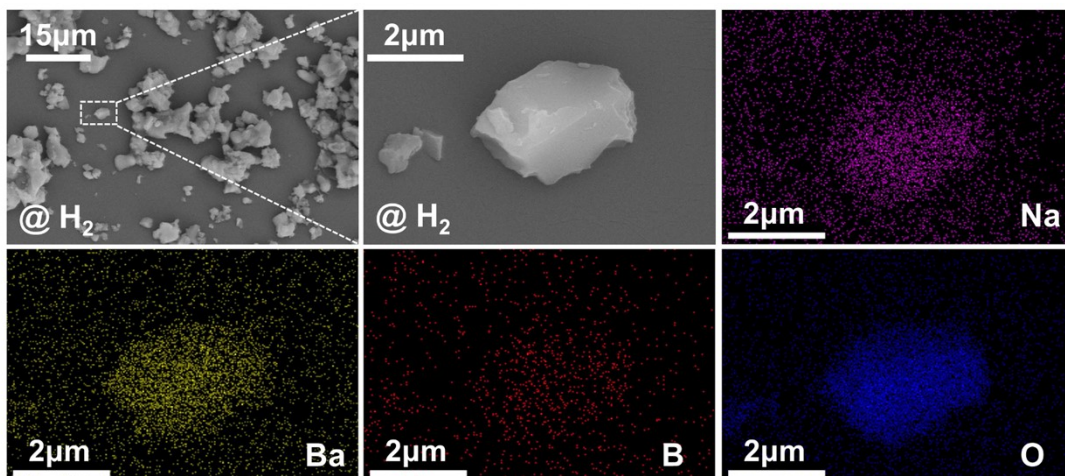

**Fig. S2** SEM images and the corresponding elemental mapping images of NBB:Eu<sup>2+</sup>@H<sub>2</sub> sample.

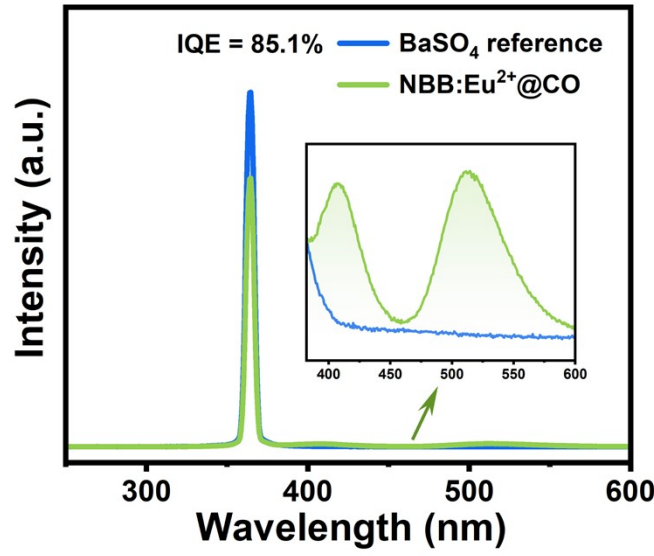

**Fig. S3** IQE of NBB:0.03Eu<sup>2+</sup>@CO sample.

The internal quantum efficiency (IQE) can be calculated by the following equation:

$$IQE = \frac{\int L_S}{\int E_R - \int E_S} \quad (1)$$

where  $\int L_S$  represents the integral area of emission spectrum,  $\int E_R$  and  $\int E_S$  represent the integral area of excitation spectrum without and with the phosphor in the integrating sphere, respectively. As shown in the figure, under 365 nm excitation, the values of IQE of NBB:0.03Eu<sup>2+</sup>@CO is calculated to be 85.1%.

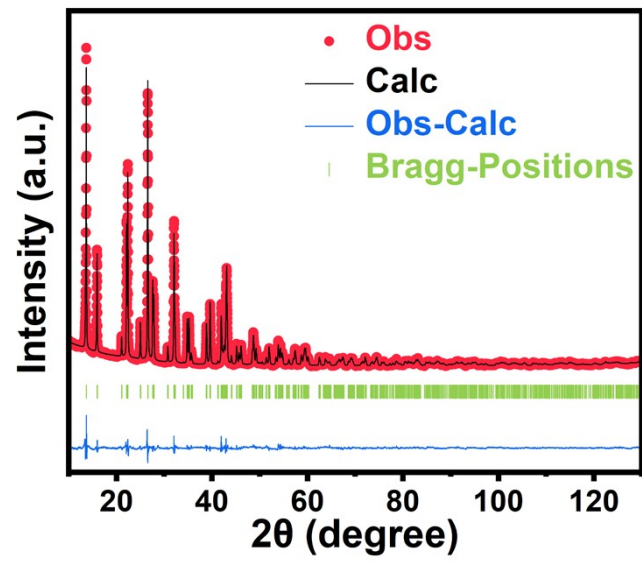

**Fig. S4** Rietveld refinement of XRD patterns of NBB:0.1Eu<sup>2+</sup>@CH sample.

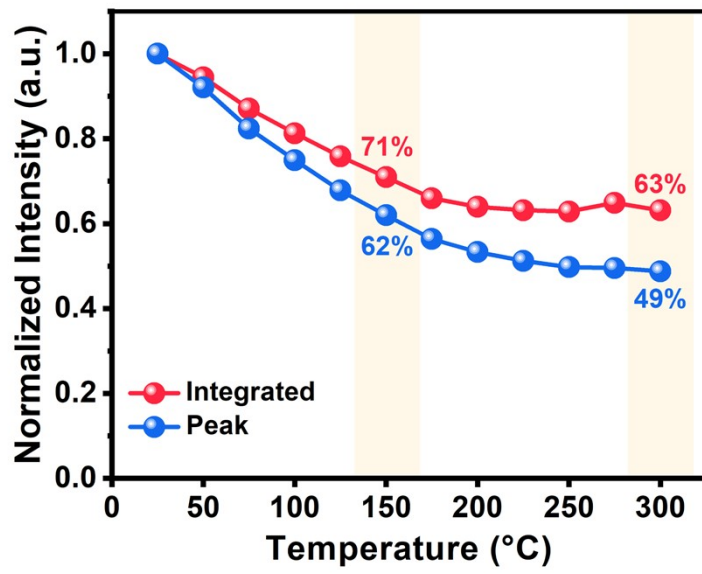

**Fig. S5** Normalized integrated emission and peak intensity of NBB:0.03Eu<sup>2+</sup>@H<sub>2</sub> sample as a function of temperature.

## Supporting Tables:

**Table S1** Crystallographic data for NBB:Eu<sup>2+</sup>@CO, NBB:Eu<sup>2+</sup>@H<sub>2</sub> and NBB:Eu<sup>2+</sup>@CH samples.

| Formula                  | NBB:Eu <sup>2+</sup> @CO | NBB:Eu <sup>2+</sup> @H <sub>2</sub> | NBB:Eu <sup>2+</sup> @CH |
|--------------------------|--------------------------|--------------------------------------|--------------------------|
| Space group              | <i>R3c</i>               | <i>R3c</i>                           | <i>R3c</i>               |
| a (Å)                    | 11.09019(3)              | 11.09235(4)                          | 11.08931(3)              |
| b (Å)                    | 11.09019(3)              | 11.09235(4)                          | 11.08931(3)              |
| c (Å)                    | 17.42435(11)             | 17.41842(12)                         | 17.42104(10)             |
| Volume (Å <sup>3</sup> ) | 1855.945                 | 1856.037                             | 1855.294                 |
| $\alpha = \beta$ (°)     | 90                       | 90                                   | 90                       |
| $\gamma$ (°)             | 120                      | 120                                  | 120                      |
| R <sub>p</sub> (%)       | 4.2190                   | 3.7302                               | 3.5794                   |
| R <sub>wp</sub> (%)      | 5.7504                   | 4.8144                               | 4.7914                   |
| R <sub>B</sub> (%)       | 6.1603                   | 6.3781                               | 4.4847                   |
| S                        | 3.3505                   | 2.8976                               | 2.8161                   |

**Table S2** The IQE and thermal stability at 150 °C of the reported related Eu<sup>2+</sup>-activated phosphors.

| <b>Phosphor</b>                                                                     | <b>IQE (%)</b> | <b>Thermal stability at 150 °C (%)</b> | <b>Ref.</b> |
|-------------------------------------------------------------------------------------|----------------|----------------------------------------|-------------|
| BaAl <sub>4</sub> Sb <sub>2</sub> O <sub>12</sub> :Eu <sup>2+</sup>                 | 96.7           | 94                                     | 1           |
| CaO:Eu <sup>2+</sup> @C+GeO <sub>2</sub>                                            | 76             | -                                      | 2           |
| Sr(Li <sub>2</sub> Al <sub>2</sub> O <sub>2</sub> N <sub>2</sub> ):Eu <sup>2+</sup> | 80             | 96                                     | 3           |
| RbLi(Li <sub>3</sub> SiO <sub>4</sub> ) <sub>2</sub> :Eu <sup>2+</sup>              | 80             | 103                                    | 4           |
| (Sr,Ba)Y <sub>2</sub> O <sub>4</sub> :Eu <sup>2+</sup>                              | -              | 90                                     | 5           |
| BaLi <sub>2</sub> Al <sub>2</sub> Si <sub>2</sub> N <sub>6</sub> :Eu <sup>2+</sup>  | 54.8           | 85.9                                   | 6           |
| Rb <sub>3</sub> YSi <sub>2</sub> O <sub>7</sub> :Eu <sup>2+</sup>                   | 32.6           | 81                                     | 7           |
| NBB:Eu <sup>2+</sup> @CO                                                            | 85.1           | 106                                    | This work   |



**Table S3** Structural parameters of NBB:Eu<sup>2+</sup>@CO, NBB:Eu<sup>2+</sup>@H<sub>2</sub> and NBB:Eu<sup>2+</sup>@CH samples.

| Atom                                 | x         | y          | z           | B (Å <sup>2</sup> ) | Occ.       |
|--------------------------------------|-----------|------------|-------------|---------------------|------------|
| NBB:Eu <sup>2+</sup> @CO             |           |            |             |                     |            |
| Na                                   | 0         | 0          | 0.22273(11) | 1.096(15)           | 0.9621(13) |
| Eu                                   | 0         | 0          | 0.22273(11) | 1.096(15)           | 0.0379(13) |
| Ba                                   | 0         | 0          | 0           | 1.096(15)           | 0.9379(13) |
| Eu                                   | 0         | 0          | 0           | 1.096(15)           | 0.0621(13) |
| B1                                   | 0.3783(9) | 0.2523(9)  | 0.0504(4)   | 0.82(3)             | 1          |
| B2                                   | 0.4455(8) | 0.3893(8)  | 0.1684(4)   | 0.82(3)             | 1          |
| B3                                   | 0.2548(8) | 0.3552(8)  | 0.1117(4)   | 0.82(3)             | 1          |
| O1                                   | 0.4774(3) | 0.3328(5)  | 0.11429(17) | 0.82(3)             | 1          |
| O2                                   | 0.2528(4) | 0.2548(4)  | 0.0571(2)   | 0.82(3)             | 1          |
| O3                                   | 0.1933(4) | 0.4277(3)  | 0.06567(19) | 0.82(3)             | 1          |
| O4                                   | 0.3601(4) | 0.4265(4)  | 0.1619(3)   | 0.82(3)             | 1          |
| O5                                   | 0.1087(5) | 0.2275(3)  | 0.16330(18) | 0.82(3)             | 1          |
| NBB:Eu <sup>2+</sup> @H <sub>2</sub> |           |            |             |                     |            |
| Na                                   | 0         | 0          | 0.22228(13) | 0.798(16)           | 0.9955(14) |
| Eu                                   | 0         | 0          | 0.22228(13) | 0.798(16)           | 0.0045(14) |
| Ba                                   | 0         | 0          | 0           | 0.798(16)           | 0.9045(14) |
| Eu                                   | 0         | 0          | 0           | 0.798(16)           | 0.0955(14) |
| B1                                   | 0.3765(9) | 0.2551(8)  | 0.0668(4)   | 0.59(4)             | 1          |
| B2                                   | 0.4665(8) | 0.4174(8)  | 0.1806(5)   | 0.59(4)             | 1          |
| B3                                   | 0.2419(9) | 0.3342(11) | 0.1024(4)   | 0.59(4)             | 1          |
| O1                                   | 0.4851(4) | 0.3312(5)  | 0.11439(17) | 0.59(4)             | 1          |
| O2                                   | 0.2579(4) | 0.2439(4)  | 0.0601(2)   | 0.59(4)             | 1          |
| O3                                   | 0.2110(6) | 0.4278(3)  | 0.06758(17) | 0.59(4)             | 1          |
| O4                                   | 0.3397(6) | 0.4147(4)  | 0.1667(4)   | 0.59(4)             | 1          |
| O5                                   | 0.0900(4) | 0.2380(3)  | 0.1614(2)   | 0.59(4)             | 1          |

---

| NBB:Eu <sup>2+</sup> @CH |           |           |             |           |     |
|--------------------------|-----------|-----------|-------------|-----------|-----|
| Na                       | 0         | 0         | 0.22208(11) | 0.917(13) | 1   |
| Eu                       | 0         | 0         | 0.22208(11) | 0.917(13) | 0   |
| Ba                       | 0         | 0         | 0           | 0.917(13) | 0.9 |
| Eu                       | 0         | 0         | 0           | 0.917(13) | 0.1 |
| B1                       | 0.3923(7) | 0.2472(7) | 0.0659(3)   | 1.07(3)   | 1   |
| B2                       | 0.4626(7) | 0.4027(7) | 0.1717(4)   | 1.07(3)   | 1   |
| B3                       | 0.2222(6) | 0.3299(9) | 0.1135(3)   | 1.07(3)   | 1   |
| O1                       | 0.4773(3) | 0.3160(4) | 0.11844(18) | 1.07(3)   | 1   |
| O2                       | 0.2493(3) | 0.2320(4) | 0.05574(18) | 1.07(3)   | 1   |
| O3                       | 0.1958(4) | 0.4301(3) | 0.06796(19) | 1.07(3)   | 1   |
| O4                       | 0.3467(4) | 0.4119(3) | 0.1615(3)   | 1.07(3)   | 1   |
| O5                       | 0.1103(5) | 0.2338(2) | 0.15810(18) | 1.07(3)   | 1   |

---

## References

1. J. H. Wang, L. L. Dong, Z. Lyu, D. S. Sun, T. X. Tan and H. P. You, *Adv. Funct. Mater.*, 2023, **33**, 2214611.
2. J. W. Qiao, S. Zhang, X. Q. Zhou, W. B. Chen, R. Gautier and Z. G. Xia, *Adv. Mater.*, 2022, **34**, 2201887.
3. G. J. Hoerder, M. Seibald, D. Baumann, T. Schröder, S. Peschke, P. C. Schmid, T. Tyborski, P. Pust, I. Stoll, M. Bergler, C. Patzig, S. Reissaus, M. Krause, L. Berthold, T. Höche, D. Johrendt and H. Huppertz, *Nat. Commun.*, 2019, **10**, 1824.
4. M. Zhao, K. Cao, M. J. Liu, J. Zhang, R. Chen, Q. Y. Zhang and Z. G. Xia, *Angew. Chem. Int. Ed.*, 2020, **59**, 12938-12943.
5. Z. Y. Yang, Y. F. Zhao, Y. Y. Zhou, J. W. Qiao, Y. C. Chuang, M. S. Molokeev and Z. G. Xia, *Adv. Funct. Mater.*, 2022, **32**, 2103927.
6. Y. C. Wang, T. Seto, K. Ishigaki, Y. Uwatoko, G. J. Xiao, B. Zou, G. S. Li, Z. B. Tang, Z. B. Li and Y. H. Wang, *Adv. Funct. Mater.*, 2020, **30**, 2001384.
7. J. W. Qiao, L. X. Ning, M. S. Molokeev, Y. C. Chuang, Q. Y. Zhang, K. R. Poepelmeier and Z. G. Xia, *Angew. Chem. Int. Ed.*, 2019, **58**, 11521-11526.
